# Supplementary material
Source: Springer Nature journal article supplement (https://www.springermedizin.de/resource/supplementary/12885_2011_3022_MOESM6_ESM.pdf/9462756)

**Gemcitabine  $4.10^{-7}M$**

**Control**

**16h**

**48h**

**H2AXp**

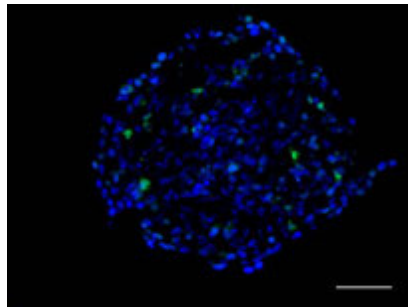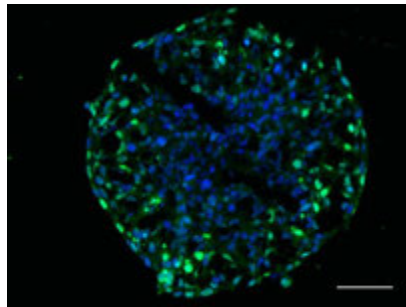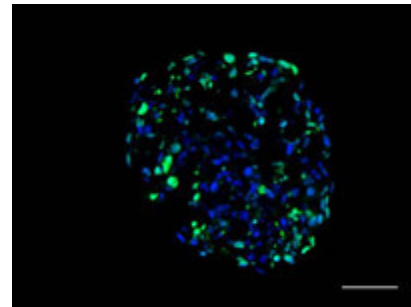

**Green FUCCI  
probe**

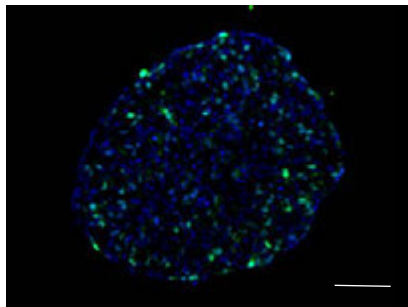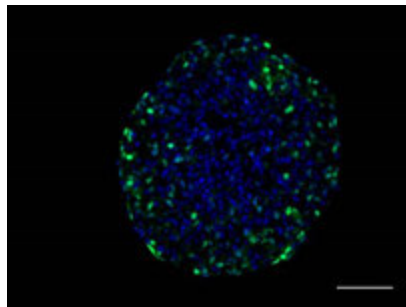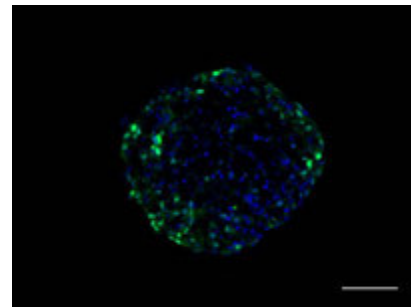

**Cleaved  
PARP**

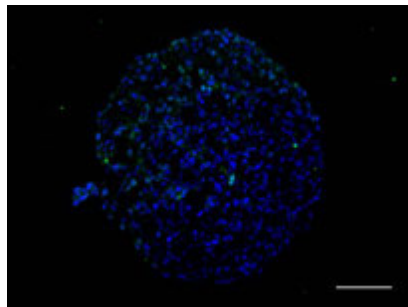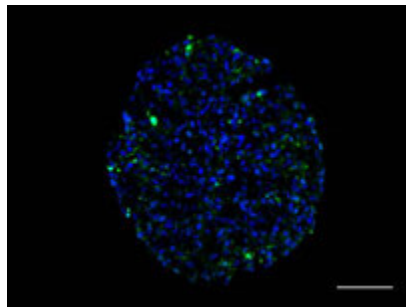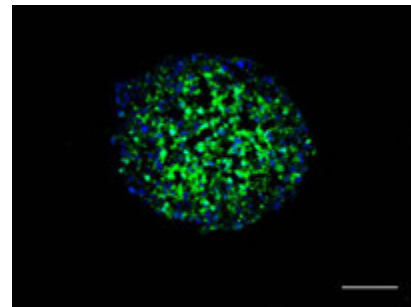

Supplement: MOESM6 [file 9462756]
